# Supplementary material for: The relationship between perceptions and self-paid hepatitis B vaccination: A structural equation modeling approach
Source: PubMed Central journal article supplement (PMC6283584; doi:10.1371/journal.pone.0208402), 2018-12-06
Supplement: pone.0208402.s001.pdf [file pone.0208402.s001.pdf]

## Demographic data

1. Age:  Years
2. Gender
  - Male
  - Female
3. Race
  - Malay
  - Chinese
  - Indian
  - Others: \_\_\_\_\_
4. Marital status
  - Single
  - Married
  - Divorced
  - Widow/Widower
5. Occupation
  - Public sector
  - Private sector
  - S Self-employed
  - Student
  - Retired
  - Unemployment
  - Others: \_\_\_\_\_
6. Educational attainment
  - Never been to school
  - Primary school
  - Secondary school
  - Diploma/certificate
  - Undergraduate
  - Post graduate
7. Household monthly income:  RM

State the extent to which you agree with each of the following.  
Tick(√) your answer.

## Willingness to Pay

- 1- Strongly disagree
- 2- Disagree
- 3- Somewhat disagree
- 4- Neither agree or disagree
- 5- Somewhat agree
- 6- Agree
- 7- Strongly agree

| No | Question                                                        |   |   |   |   |   |   |   |
|----|-----------------------------------------------------------------|---|---|---|---|---|---|---|
| 1  | I agree to pay for hepatitis B vaccine at the expense of my own | 1 | 2 | 3 | 4 | 5 | 6 | 7 |

## Perceived Susceptibility

- 1- Strongly disagree
- 2- Disagree
- 3- Somewhat disagree
- 4- Neither agree or disagree
- 5- Somewhat agree
- 6- Agree
- 7- Strongly agree

| No | Question                                                                 |   |   |   |   |   |   |   |
|----|--------------------------------------------------------------------------|---|---|---|---|---|---|---|
| 1  | I am less likely than most people to get infected with hepatitis B virus | 1 | 2 | 3 | 4 | 5 | 6 | 7 |
| 2  | My body could fight off hepatitis B virus infection.                     | 1 | 2 | 3 | 4 | 5 | 6 | 7 |
| 3  | I never worry about getting infected with hepatitis B virus              | 1 | 2 | 3 | 4 | 5 | 6 | 7 |

## Perceived Severity

- 1- Strongly disagree
- 2- Disagree
- 3- Somewhat disagree
- 4- Neither agree or disagree
- 5- Somewhat agree
- 6- Agree
- 7- Strongly agree

| No | Question                                                                          |   |   |   |   |   |   |   |
|----|-----------------------------------------------------------------------------------|---|---|---|---|---|---|---|
| 1  | I believe that I am at a higher risk of hepatitis B virus infection               | 1 | 2 | 3 | 4 | 5 | 6 | 7 |
| 2  | I believe that my ethnic group is at a higher risk of hepatitis B virus infection | 1 | 2 | 3 | 4 | 5 | 6 | 7 |
| 3  | I believe that hepatitis B virus infection is a serious disease                   | 1 | 2 | 3 | 4 | 5 | 6 | 7 |
| 4  | I believe that HB infection leads to death                                        | 1 | 2 | 3 | 4 | 5 | 6 | 7 |

## Perceived Benefit

- 1- Strongly disagree
- 2- Disagree
- 3- Somewhat disagree
- 4- Neither agree or disagree
- 5- Somewhat agree
- 6- Agree
- 7- Strongly agree

| No | Question                                                                                                          |   |   |   |   |   |   |   |
|----|-------------------------------------------------------------------------------------------------------------------|---|---|---|---|---|---|---|
| 1  | I believe if I get the hepatitis B vaccine, I shall be protected from hepatitis B virus infection                 | 1 | 2 | 3 | 4 | 5 | 6 | 7 |
| 2  | If I take the hepatitis B vaccine, it will reduce my worry about liver disease                                    | 1 | 2 | 3 | 4 | 5 | 6 | 7 |
| 3  | I believe in the effectiveness of the hepatitis B vaccine now                                                     | 1 | 2 | 3 | 4 | 5 | 6 | 7 |
| 4  | I believe a vaccine for hepatitis B strengthens the immune system against hepatitis B virus                       | 1 | 2 | 3 | 4 | 5 | 6 | 7 |
| 5  | I believe that getting the hepatitis B vaccine is a good way to protect yourself from hepatitis B virus infection | 1 | 2 | 3 | 4 | 5 | 6 | 7 |

## Perceived Barriers

- 1- Strongly disagree
- 2- Disagree
- 3- Somewhat disagree
- 4- Neither agree or disagree
- 5- Somewhat agree
- 6- Agree
- 7- Strongly agree

| No | Question                                                                          |   |   |   |   |   |   |   |
|----|-----------------------------------------------------------------------------------|---|---|---|---|---|---|---|
| 1  | I believe that the vaccination is not effective for me                            | 1 | 2 | 3 | 4 | 5 | 6 | 7 |
| 2  | I believe that the hepatitis B vaccination is likely to cause more harm than good | 1 | 2 | 3 | 4 | 5 | 6 | 7 |
| 3  | I do not have the time to get the vaccination                                     | 1 | 2 | 3 | 4 | 5 | 6 | 7 |

## Cues to action

- 1- Strongly disagree
- 2- Disagree
- 3- Somewhat disagree
- 4- Neither agree or disagree
- 5- Somewhat agree
- 6- Agree
- 7- Strongly agree

| No | Question                                                                                |   |   |   |   |   |   |   |
|----|-----------------------------------------------------------------------------------------|---|---|---|---|---|---|---|
| 1  | I think the screening for HB infection is a good practice                               | 1 | 2 | 3 | 4 | 5 | 6 | 7 |
| 2  | An additional dose (booster) of the vaccine for hepatitis B should be taken when needed | 1 | 2 | 3 | 4 | 5 | 6 | 7 |
| 3  | I think all members of the family and friends should get the hepatitis B vaccine        | 1 | 2 | 3 | 4 | 5 | 6 | 7 |

## Data demografis

1. Umur:  Tahun
2. Jantina
  - Lelaki
  - Perempuan
3. Keturunan
  - Malayu
  - Cina
  - India
  - Lain-lain: \_\_\_\_\_
4. Taraf perkahwinan:
  - Bujang
  - Kahwin
  - Bercerai
  - Janda/Duda
5. Occupation
  - Sektor awam
  - Sektor swasta
  - Bekerja sendiri
  - Pelajar
  - Bersara
  - Tidak bekerja
  - Lain-lain: \_\_\_\_\_
6. Pendidikan
  - Tidak pernah ke sekolah
  - Sekolah Rendah
  - Sekolah Menengah
  - Diploma/Sijil
  - Sarjana Muda
  - Pascasiswazah
7. Berapakah pendapatan bulanan isirumah Anda:  RM

Nyatakan sejauh mana anda bersetuju dengan setiap yang berikut.  
Tandakan (√) jawapan anda.

## ***Willingness to Pay***

- 1- Sangat tidak setuju
- 2- Tidak bersetuju
- 3- Agak tidak setuju
- 4- Antara setuju dan tidak bersetuju
- 5- Agak setuju
- 6- Setuju
- 7- Sangat bersetuju

| No | Question                                                                     |   |   |   |   |   |   |   |
|----|------------------------------------------------------------------------------|---|---|---|---|---|---|---|
| 1  | Saya setuju untuk membayar vaksin hepatitis B atas perbelanjaan saya sendiri | 1 | 2 | 3 | 4 | 5 | 6 | 7 |

## ***Perceived Susceptibility***

- 2- Sangat tidak setuju
- 2- Tidak bersetuju
- 3- Agak tidak setuju
- 4- Antara setuju dan tidak bersetuju
- 5- Agak setuju
- 6- Setuju
- 7- Sangat bersetuju

| No | Soalan                                                                                               |   |   |   |   |   |   |   |
|----|------------------------------------------------------------------------------------------------------|---|---|---|---|---|---|---|
| 1  | Peluang saya untuk dijangkiti dengan HepB adalah sangat sedikit jika dibandingkan dengan orang lain. | 1 | 2 | 3 | 4 | 5 | 6 | 7 |
| 2  | Badan saya boleh melawan jangkitan HepB.                                                             | 1 | 2 | 3 | 4 | 5 | 6 | 7 |
| 3  | Saya tidak pernah bimbang akan dijangkiti oleh HepB                                                  | 1 | 2 | 3 | 4 | 5 | 6 | 7 |

## **Perceived Severity**

- 1- Sangat tidak setuju
- 2- Tidak bersetuju
- 3- Agak tidak setuju
- 4- Antara setuju dan tidak bersetuju
- 5- Agak setuju
- 6- Setuju
- 7- Sangat bersetuju

| No | Soalan                                                                   |   |   |   |   |   |   |   |
|----|--------------------------------------------------------------------------|---|---|---|---|---|---|---|
| 1  | Saya percaya bahawa saya berisiko tinggi untuk mendapat jangkitan HepB.  | 1 | 2 | 3 | 4 | 5 | 6 | 7 |
| 2  | Saya percaya bahawa keturunan saya berisiko tinggi untuk jangkitan HepB. | 1 | 2 | 3 | 4 | 5 | 6 | 7 |
| 3  | Saya percaya bahawa jangkitan HepB adalah penyakit yang serius.          | 1 | 2 | 3 | 4 | 5 | 6 | 7 |
| 4  | Saya percaya bahawa jangkitan HepB membawa kepada kematian.              | 1 | 2 | 3 | 4 | 5 | 6 | 7 |

## **Perceived Benefit**

- 1- Sangat tidak setuju
- 2- Tidak bersetuju
- 3- Agak tidak setuju
- 4- Antara setuju dan tidak bersetuju
- 5- Agak setuju
- 6- Setuju
- 7- Sangat bersetuju

| No | Soalan                                                                                                             |   |   |   |   |   |   |   |
|----|--------------------------------------------------------------------------------------------------------------------|---|---|---|---|---|---|---|
| 1  | Saya percaya jika saya mendapat vaksin HepB, saya boleh dilindungi dari jangkitan HepB.                            | 1 | 2 | 3 | 4 | 5 | 6 | 7 |
| 2  | Jika saya mengambil vaksin HepB ia akan megurangkan kebimbangan saya mengenai penyakit hati                        | 1 | 2 | 3 | 4 | 5 | 6 | 7 |
| 3  | Saya percaya terhadap keberkesanan vaksin HepB sekarang.                                                           | 1 | 2 | 3 | 4 | 5 | 6 | 7 |
| 4  | Saya percaya vaksin HepB menguatkan system imun saya terhadap virus HepB.                                          | 1 | 2 | 3 | 4 | 5 | 6 | 7 |
| 5  | Saya percaya bahawa mendapat vaksin HepB adalah cara yang baik untuk melindungi diri daripada jangkitan virus HepB | 1 | 2 | 3 | 4 | 5 | 6 | 7 |

## **Perceived Barriers**

- 1- Sangat tidak setuju
- 2- Tidak bersetuju
- 3- Agak tidak setuju
- 4- Antara setuju dan tidak bersetuju
- 5- Agak setuju
- 6- Setuju
- 7- Sangat bersetuju

| No | Soalan                                                                                    |   |   |   |   |   |   |   |
|----|-------------------------------------------------------------------------------------------|---|---|---|---|---|---|---|
| 1  | Saya percaya bahawa vaksinasi tidak berkesan untuk saya.                                  | 1 | 2 | 3 | 4 | 5 | 6 | 7 |
| 2  | Saya percaya bahawa vaksinasi HepB mendatangkan lebih banyak keburukan daripada kebaikan. | 1 | 2 | 3 | 4 | 5 | 6 | 7 |
| 3  | Saya tidak mempunyai masa untuk mendapatkan vaksinasi.                                    | 1 | 2 | 3 | 4 | 5 | 6 | 7 |

## **Cues to action**

- 1- Sangat tidak setuju
- 2- Tidak bersetuju
- 3- Agak tidak setuju
- 4- Antara setuju dan tidak bersetuju
- 5- Agak setuju
- 6- Setuju
- 7- Sangat bersetuju

| No | Soalan                                                                            |   |   |   |   |   |   |   |
|----|-----------------------------------------------------------------------------------|---|---|---|---|---|---|---|
| 1  | Saya rasa saringan untuk jangkitan HepB adalah amalan baik.                       | 1 | 2 | 3 | 4 | 5 | 6 | 7 |
| 2  | Dos tambahan vaksin HepB perlu diambil apabila diperlukan.                        | 1 | 2 | 3 | 4 | 5 | 6 | 7 |
| 3  | Saya rasa semua ahli keluarga dan rakan-rakan saya perlu mendapatkan vaksin HepB. | 1 | 2 | 3 | 4 | 5 | 6 | 7 |
